# Supplementary material for: Digital Rock Physics in Cuttings Using High-Resolution Thin Section Scan Images
Source: MDPI journal article supplement (doi:10.3390/min13091140), 2023-08-29
Supplement: s1 [file s1]

Archive with 3 entries (3 files):
- minerals-2465930-table S3-Digital Rock Physics (DRP) results for pseudo-cuttings samples. .xlsx
- minerals-2465930-table S4-Digital Rock Physics (DRP) results for cuttings samples. .xlsx
- minerals-2465930-TablesS1-S2.pdf
