# Supplementary material for: Digital Rock Physics in Cuttings Using High-Resolution Thin Section Scan Images
Source: MDPI journal article supplement (doi:10.3390/min13091140), 2023-08-29
Supplement: s1 [file s1 › minerals-2465930-table S3-Digital Rock Physics (DRP) results for pseudo-cuttings samples. .xlsx]

## Sheet: DRP_pseudocuttings
Sample ID	Name	Porosity (frac.)	Permeability (mD)
100	Bandera Brown	0.187631	24.1623
100	Bandera Brown	0.196345	24.2404
100	Bandera Brown	0.179276	13.0303
100	Bandera Brown	0.204304	41.0725
100	Bandera Brown	0.19251	50.7914
100	Bandera Brown	0.192586	21.613
100	Bandera Brown	0.189677	32.8815
100	Bandera Brown	0.201295	34.8115
100	Bandera Brown	0.206197	44.1985
100	Bandera Brown	0.203333	29.1838
100	Bandera Brown	0.169753	11.3681
100	Bandera Brown	0.190315	17.9956
100	Bandera Brown	0.192268	29.5897
100	Bandera Brown	0.202777	26.2693
100	Bandera Brown	0.183967	19.5992
100	Bandera Brown	0.201035	31.552
100	Bandera Brown	0.202022	28.4416
100	Bandera Brown	0.191369	26.4418
100	Bandera Brown	0.183453	17.8413
100	Bandera Brown	0.195874	24.2696
100	Bandera Brown	0.200969	34.2619
100	Bandera Brown	0.191307	18.8685
100	Bandera Brown	0.166009	7.68094
100	Bandera Brown	0.194983	21.727
100	Bandera Brown	0.188782	21.343
100	Bandera Brown	0.187882	19.6373
100	Bandera Brown	0.175185	10.7463
100	Bandera Brown	0.212253	38.2298
100	Bandera Brown	0.196214	28.7334
100	Bandera Brown	0.191203	20.7482
100	Bandera Brown	0.203325	30.7865
100	Bandera Brown	0.187184	17.6277
100	Bandera Brown	0.185244	18.8701
100	Bandera Brown	0.194234	23.7873
100	Bandera Brown	0.195453	25.1901
100	Bandera Brown	0.17967	16.2061
100	Bandera Brown	0.192231	26.2278
100	Bandera Brown	0.180512	15.7158
100	Bandera Brown	0.187479	23.4844
100	Bandera Brown	0.183928	13.1047
100	Bandera Brown	0.188157	14.9178
100	Bandera Brown	0.199346	29.4163
100	Bandera Brown	0.200519	27.8734
100	Bandera Brown	0.199295	27.4193
100	Bandera Brown	0.181809	13.7963
100	Bandera Brown	0.184123	14.8956
100	Bandera Brown	0.191628	23.3353
100	Bandera Brown	0.191146	21.531
100	Bandera Brown	0.16807	6.54372
100	Bandera Brown	0.186739	15.0475
100	Bandera Brown	0.177533	13.1272
100	Bandera Brown	0.180308	11.1036
100	Bandera Brown	0.183409	14.6409
100	Bandera Brown	0.205529	39.5706
100	Bandera Brown	0.19602	23.1839
100	Bandera Brown	0.194358	27.9583
100	Bandera Brown	0.181479	17.0965
100	Bandera Brown	0.191365	21.0614
100	Bandera Brown	0.186298	12.2582
100	Bandera Brown	0.204732	40.1872
100	Bandera Brown	0.216	58.8431
100	Bandera Brown	0.19869	39.7049
100	Bandera Brown	0.180247	16.656
100	Bandera Brown	0.193091	28.4531
100	Bandera Brown	0.193335	17.0358
100	Bandera Brown	0.186432	17.3945
100	Bandera Brown	0.189588	18.0038
100	Bandera Brown	0.190517	19.0338
100	Bandera Brown	0.211615	42.2337
100	Bandera Brown	0.187012	20.7003
100	Bandera Brown	0.20311	37.3231
100	Bandera Brown	0.191562	20.0566
100	Bandera Brown	0.200039	33.4395
100	Bandera Brown	0.176766	12.7524
100	Bandera Brown	0.216846	57.8263
100	Bandera Brown	0.199648	28.5641
100	Bandera Brown	0.189152	19.1415
100	Bandera Brown	0.193397	25.0779
100	Bandera Brown	0.203322	42.1073
100	Bandera Brown	0.199444	33.8582
100	Bandera Brown	0.187571	16.944
100	Bandera Brown	0.183133	16.484
100	Bandera Brown	0.196046	35.6377
100	Bandera Brown	0.192335	24.6831
100	Bandera Brown	0.198275	28.3462
100	Bandera Brown	0.194213	21.1453
100	Bandera Brown	0.200033	23.3019
100	Bandera Brown	0.189932	23.5113
100	Bandera Brown	0.189793	18.7799
100	Bandera Brown	0.205609	29.7062
100	Bandera Brown	0.194977	29.3836
100	Bandera Brown	0.192618	23.0148
100	Bandera Brown	0.212316	50.9297
100	Bandera Brown	0.202902	33.243
100	Bandera Brown	0.210754	32.5994
100	Bandera Brown	0.181274	11.3711
100	Bandera Brown	0.188997	18.4263
100	Bandera Brown	0.211067	52.7933
100	Bandera Brown	0.21015	33.8197
100	Bandera Brown	0.195638	26.1345
100	Bandera Brown	0.188106	15.5553
100	Bandera Brown	0.199892	25.8047
100	Bandera Brown	0.187113	18.933
100	Bandera Brown	0.219361	62.4589
100	Bandera Brown	0.197608	19.1541
100	Bandera Brown	0.189105	18.8587
100	Bandera Brown	0.189247	17.8486
100	Bandera Brown	0.215578	53.4676
100	Bandera Brown	0.184724	16.4892
100	Bandera Brown	0.188068	17.047
100	Bandera Brown	0.194434	18.9733
100	Bandera Brown	0.18392	14.2373
100	Bandera Brown	0.212965	49.5971
100	Bandera Brown	0.198078	24.9595
100	Bandera Brown	0.210384	40.9149
100	Bandera Brown	0.197857	27.4384
100	Bandera Brown	0.201762	43.9931
100	Bandera Brown	0.193641	29.1242
100	Bandera Brown	0.193402	26.0985
100	Bandera Brown	0.199942	24.949
100	Bandera Brown	0.208846	52.5595
100	Bandera Brown	0.205901	40.0311
100	Bandera Brown	0.218023	47.3286
100	Bandera Brown	0.198009	24.4669
100	Bandera Brown	0.175658	10.1674
100	Bandera Brown	0.191639	25.5197
100	Bandera Brown	0.188477	19.1342
100	Bandera Brown	0.18692	18.9068
100	Bandera Brown	0.182887	17.7724
100	Bandera Brown	0.184192	18.6104
100	Bandera Brown	0.191521	22.5885
100	Bandera Brown	0.186308	16.9164
100	Bandera Brown	0.191754	19.3673
100	Bandera Brown	0.197223	24.7296
100	Bandera Brown	0.198121	24.7541
100	Bandera Brown	0.189578	17.5621
100	Bandera Brown	0.197971	22.3563
100	Bandera Brown	0.184505	19.5582
100	Bandera Brown	0.177417	16.163
106	Berea Spider	0.248773	123.67
106	Berea Spider	0.226044	83.0671
106	Berea Spider	0.267405	187.022
106	Berea Spider	0.246508	140.511
106	Berea Spider	0.19647	44.8149
106	Berea Spider	0.247963	133.482
106	Berea Spider	0.258497	228.427
106	Berea Spider	0.21784	88.0919
106	Berea Spider	0.288091	353.443
106	Berea Spider	0.257595	202.286
106	Berea Spider	0.278481	321.702
106	Berea Spider	0.271942	356.898
106	Berea Spider	0.20579	2.41663
106	Berea Spider	0.252792	167.952
106	Berea Spider	0.2732	252.085
106	Berea Spider	0.243467	111.411
106	Berea Spider	0.221085	67.9268
106	Berea Spider	0.234701	95.7678
106	Berea Spider	0.263442	220.072
106	Berea Spider	0.272713	398.28
106	Berea Spider	0.238165	149.98
106	Berea Spider	0.25475	182.116
106	Berea Spider	0.19686	100.658
106	Berea Spider	0.26824	189.5
106	Berea Spider	0.227232	105.317
106	Berea Spider	0.247383	162.84
106	Berea Spider	0.230348	115.747
106	Berea Spider	0.250264	172.909
106	Berea Spider	0.242375	183.212
106	Berea Spider	0.26318	227.238
106	Berea Spider	0.275892	356.95
106	Berea Spider	0.275483	219.786
106	Berea Spider	0.22321	93.2234
106	Berea Spider	0.254914	121.086
106	Berea Spider	0.234461	102.919
106	Berea Spider	0.248455	133.986
106	Berea Spider	0.241736	187.29
106	Berea Spider	0.245211	140.21
106	Berea Spider	0.270621	235.431
106	Berea Spider	0.229346	77.7514
106	Berea Spider	0.234932	87.8735
106	Berea Spider	0.237631	186.44
106	Berea Spider	0.222462	96.7823
106	Berea Spider	0.257503	163.358
106	Berea Spider	0.194348	30.4058
106	Berea Spider	0.219005	56.4989
106	Berea Spider	0.263378	147.625
106	Berea Spider	0.254607	161.018
106	Berea Spider	0.2731	230.471
106	Berea Spider	0.262776	254.211
106	Berea Spider	0.240635	170.16
106	Berea Spider	0.2811	296.994
106	Berea Spider	0.262385	173.977
106	Berea Spider	0.249026	130.418
106	Berea Spider	0.284679	295.287
106	Berea Spider	0.282725	220.902
106	Berea Spider	0.250834	192.598
106	Berea Spider	0.245784	210.051
106	Berea Spider	0.310019	493.439
106	Berea Spider	0.261514	203.398
106	Berea Spider	0.261733	175.097
106	Berea Spider	0.263569	278.311
106	Berea Spider	0.274135	265.992
106	Berea Spider	0.236784	121.85
106	Berea Spider	0.265916	227.659
106	Berea Spider	0.227328	75.3641
106	Berea Spider	0.214287	62.0169
106	Berea Spider	0.186418	18.4502
106	Berea Spider	0.184644	30.396
106	Berea Spider	0.282487	254.501
106	Berea Spider	0.2925	311.66
106	Berea Spider	0.262542	190.997
106	Berea Spider	0.251084	242.398
106	Berea Spider	0.23535	82.321
106	Berea Spider	0.27124	315.084
106	Berea Spider	0.257738	173.007
106	Berea Spider	0.270606	209.568
106	Berea Spider	0.266114	231.313
106	Berea Spider	0.272358	326.262
106	Berea Spider	0.24707	147.599
106	Berea Spider	0.246926	117.098
106	Berea Spider	0.23293	96.3037
106	Berea Spider	0.247448	152.35
106	Berea Spider	0.206746	74.9697
106	Berea Spider	0.261934	236.24
106	Berea Spider	0.267334	306.001
106	Berea Spider	0.222189	123.926
106	Berea Spider	0.24128	193.562
106	Berea Spider	0.271775	193.158
106	Berea Spider	0.215501	73.7167
106	Berea Spider	0.254596	164.676
106	Berea Spider	0.260591	263.133
106	Berea Spider	0.234076	130.067
106	Berea Spider	0.236927	103.387
106	Berea Spider	0.250538	175.069
106	Berea Spider	0.246721	147.601
106	Berea Spider	0.258738	210.524
106	Berea Spider	0.17375	16.9254
106	Berea Spider	0.245952	162.358
106	Berea Spider	0.249895	194.835
106	Berea Spider	0.244241	155.44
106	Berea Spider	0.225746	133.636
106	Berea Spider	0.193998	34.7088
106	Berea Spider	0.248837	159.155
106	Berea Spider	0.222064	126.137
106	Berea Spider	0.238598	204.614
106	Berea Spider	0.24036	109.26
106	Berea Spider	0.248167	145.601
106	Berea Spider	0.249884	137.278
106	Berea Spider	0.24988	163.233
109	Carbon Tan	0.182696	47.0852
109	Carbon Tan	0.177365	43.0965
109	Carbon Tan	0.178876	23.4611
109	Carbon Tan	0.188938	47.9404
109	Carbon Tan	0.187085	37.7974
109	Carbon Tan	0.197567	53.6834
109	Carbon Tan	0.201671	70.5254
109	Carbon Tan	0.174675	19.9012
109	Carbon Tan	0.185096	43.7498
109	Carbon Tan	0.204611	74.9866
109	Carbon Tan	0.172092	22.0639
109	Carbon Tan	0.203126	72.0955
109	Carbon Tan	0.199936	94.1495
109	Carbon Tan	0.166997	15.3366
109	Carbon Tan	0.192052	44.5405
109	Carbon Tan	0.192727	69.6145
109	Carbon Tan	0.184143	45.5937
109	Carbon Tan	0.181602	22.2961
109	Carbon Tan	0.218532	112.349
109	Carbon Tan	0.172832	12.2329
109	Carbon Tan	0.206697	95.2992
109	Carbon Tan	0.198948	64.222
109	Carbon Tan	0.184593	43.1949
109	Carbon Tan	0.188409	59.7351
109	Carbon Tan	0.179071	54.9149
109	Carbon Tan	0.207084	183.19
109	Carbon Tan	0.180921	34.2274
109	Carbon Tan	0.192271	61.0336
109	Carbon Tan	0.171997	24.2203
109	Carbon Tan	0.208967	133.762
109	Carbon Tan	0.201637	71.8955
109	Carbon Tan	0.178903	36.3205
109	Carbon Tan	0.211753	138.027
109	Carbon Tan	0.208097	133.811
109	Carbon Tan	0.186176	40.2025
109	Carbon Tan	0.220102	127.986
109	Carbon Tan	0.200125	83.5551
109	Carbon Tan	0.196601	44.142
109	Carbon Tan	0.192488	50.8136
109	Carbon Tan	0.185103	44.8742
109	Carbon Tan	0.182136	30.7433
109	Carbon Tan	0.185814	44.7773
109	Carbon Tan	0.184043	22.7848
109	Carbon Tan	0.211871	111.201
109	Carbon Tan	0.188092	41.6769
109	Carbon Tan	0.19765	62.7228
109	Carbon Tan	0.183963	49.5329
109	Carbon Tan	0.186665	65.5098
109	Carbon Tan	0.179461	25.8138
109	Carbon Tan	0.180399	22.8584
109	Carbon Tan	0.193409	65.4913
109	Carbon Tan	0.181912	36.4752
109	Carbon Tan	0.202342	60.1593
109	Carbon Tan	0.19183	62.7693
109	Carbon Tan	0.187229	46.6228
109	Carbon Tan	0.205252	53.3343
109	Carbon Tan	0.184687	69.057
109	Carbon Tan	0.21603	89.1045
109	Carbon Tan	0.183971	40.6203
109	Carbon Tan	0.202007	70.7573
109	Carbon Tan	0.199855	53.0338
109	Carbon Tan	0.187534	46.1597
109	Carbon Tan	0.183506	43.964
109	Carbon Tan	0.168224	8.09484
109	Carbon Tan	0.196546	42.9564
109	Carbon Tan	0.207378	122.424
109	Carbon Tan	0.192649	46.6315
109	Carbon Tan	0.177712	32.4502
109	Carbon Tan	0.209662	117.142
109	Carbon Tan	0.177453	19.8002
109	Carbon Tan	0.184263	43.7756
109	Carbon Tan	0.209443	72.625
109	Carbon Tan	0.210461	72.7943
109	Carbon Tan	0.17488	24.935
109	Carbon Tan	0.203045	65.2767
109	Carbon Tan	0.199676	51.1633
109	Carbon Tan	0.183271	23.5478
109	Carbon Tan	0.209386	214.378
109	Carbon Tan	0.192098	54.2761
109	Carbon Tan	0.177345	43.7165
109	Carbon Tan	0.240457	276.015
109	Carbon Tan	0.172166	15.9669
109	Carbon Tan	0.183486	24.3894
109	Carbon Tan	0.200771	56.4611
109	Carbon Tan	0.1869	40.5029
109	Carbon Tan	0.190079	40.4935
109	Carbon Tan	0.191789	47.2573
109	Carbon Tan	0.183539	34.7686
109	Carbon Tan	0.204825	76.0563
109	Carbon Tan	0.204908	82.0474
109	Carbon Tan	0.202001	47.7212
109	Carbon Tan	0.200227	72.809
109	Carbon Tan	0.202495	49.4616
109	Carbon Tan	0.19686	22.6879
109	Carbon Tan	0.215809	124.705
109	Carbon Tan	0.16339	7.52032
109	Carbon Tan	0.1646	8.01817
109	Carbon Tan	0.198253	51.6319
109	Carbon Tan	0.200379	52.061
109	Carbon Tan	0.191587	49.1514
109	Carbon Tan	0.194143	54.5188
109	Carbon Tan	0.20794	73.5826
109	Carbon Tan	0.183863	37.2306
109	Carbon Tan	0.198596	47.5067
109	Carbon Tan	0.206913	64.1675
109	Carbon Tan	0.195954	47.8145
109	Carbon Tan	0.1622	9.10454
109	Carbon Tan	0.182161	35.5552
109	Carbon Tan	0.203067	55.3215
109	Carbon Tan	0.196556	52.5896
109	Carbon Tan	0.193464	50.7706
109	Carbon Tan	0.195574	51.7548
109	Carbon Tan	0.201896	84.1705
109	Carbon Tan	0.187855	50.679
109	Carbon Tan	0.172323	15.3455
109	Carbon Tan	0.185188	40.4629
109	Carbon Tan	0.184522	36.8464
109	Carbon Tan	0.186637	44.3485
109	Carbon Tan	0.184519	35.1098
109	Carbon Tan	0.204524	99.5205
109	Carbon Tan	0.18262	29.2675
109	Carbon Tan	0.186332	65.1204
109	Carbon Tan	0.181898	27.4504
109	Carbon Tan	0.192896	39.7425
109	Carbon Tan	0.188046	44.0617
109	Carbon Tan	0.183348	23.0211
109	Carbon Tan	0.190668	46.0736
109	Carbon Tan	0.17323	20.0113
109	Carbon Tan	0.177777	23.7396
109	Carbon Tan	0.189552	43.124
109	Carbon Tan	0.191653	42.0112
109	Carbon Tan	0.18089	28.5664
109	Carbon Tan	0.176603	16.1265
109	Carbon Tan	0.202989	78.4591
109	Carbon Tan	0.165905	9.49028
109	Carbon Tan	0.20348	53.4659
110	Castlegate	0.232802	117.285
110	Castlegate	0.238511	111.364
110	Castlegate	0.287689	380.911
110	Castlegate	0.270655	237.293
110	Castlegate	0.251418	301.708
110	Castlegate	0.232466	109.443
110	Castlegate	0.277529	278.701
110	Castlegate	0.256035	162.028
110	Castlegate	0.242952	142.531
110	Castlegate	0.26374	212.127
110	Castlegate	0.295877	391.375
110	Castlegate	0.252669	178.187
110	Castlegate	0.258438	261.936
110	Castlegate	0.267167	339.387
110	Castlegate	0.287313	351.522
110	Castlegate	0.184083	40.2373
110	Castlegate	0.25239	236.46
110	Castlegate	0.270716	367.31
110	Castlegate	0.214315	80.2359
110	Castlegate	0.225651	103.497
110	Castlegate	0.290617	389.323
110	Castlegate	0.256538	155.902
110	Castlegate	0.273546	243.7
110	Castlegate	0.213708	116.114
110	Castlegate	0.233793	147.043
110	Castlegate	0.2137	62.7504
110	Castlegate	0.27757	227.35
110	Castlegate	0.231646	146.894
110	Castlegate	0.255118	196.77
110	Castlegate	0.27242	197.486
110	Castlegate	0.254881	316.501
110	Castlegate	0.21828	72.2771
110	Castlegate	0.235396	110.468
110	Castlegate	0.229118	140.751
110	Castlegate	0.230858	102.98
110	Castlegate	0.275539	222.319
110	Castlegate	0.273161	302.076
110	Castlegate	0.280218	311.094
110	Castlegate	0.238873	129.518
110	Castlegate	0.273118	200.28
110	Castlegate	0.229769	128.906
110	Castlegate	0.291337	365.914
110	Castlegate	0.256331	164.385
110	Castlegate	0.276995	329.47
110	Castlegate	0.279184	282.32
110	Castlegate	0.246213	136.764
110	Castlegate	0.264951	253.702
110	Castlegate	0.273397	243.933
110	Castlegate	0.24288	170.362
110	Castlegate	0.263689	201.14
110	Castlegate	0.322309	545.461
110	Castlegate	0.24657	180.926
110	Castlegate	0.250701	256.17
110	Castlegate	0.242123	129.392
110	Castlegate	0.279947	636.48
110	Castlegate	0.234694	111.181
110	Castlegate	0.293982	386.92
110	Castlegate	0.289085	384.066
110	Castlegate	0.257708	206.831
110	Castlegate	0.259284	178.625
110	Castlegate	0.27033	321.816
110	Castlegate	0.281703	249.985
110	Castlegate	0.219706	83.9667
110	Castlegate	0.233056	139.23
110	Castlegate	0.262282	196.587
110	Castlegate	0.264991	256.156
110	Castlegate	0.269333	207.951
110	Castlegate	0.273985	245.884
110	Castlegate	0.241922	161.698
110	Castlegate	0.258049	333.913
110	Castlegate	0.276858	328.347
110	Castlegate	0.26183	209.297
110	Castlegate	0.298545	325.403
110	Castlegate	0.240843	199.521
110	Castlegate	0.249758	141.568
110	Castlegate	0.223736	108.166
110	Castlegate	0.256833	242.506
110	Castlegate	0.279468	240.659
110	Castlegate	0.293815	394.632
110	Castlegate	0.267881	248.793
110	Castlegate	0.23931	149.453
110	Castlegate	0.280944	280.493
110	Castlegate	0.263603	257.093
110	Castlegate	0.244335	143.878
110	Castlegate	0.291336	371.921
110	Castlegate	0.225248	154.469
110	Castlegate	0.253129	164.768
110	Castlegate	0.273664	381.439
110	Castlegate	0.198526	64.4305
110	Castlegate	0.241711	123.442
110	Castlegate	0.282685	304.328
110	Castlegate	0.250806	203.833
110	Castlegate	0.250035	270.619
110	Castlegate	0.248267	191.813
110	Castlegate	0.241435	193.636
110	Castlegate	0.301645	465.896
110	Castlegate	0.23949	158.077
110	Castlegate	0.264007	257.986
110	Castlegate	0.182658	33.6361
110	Castlegate	0.289958	309.74
110	Castlegate	0.234879	118.458
110	Castlegate	0.26911	410.323
110	Castlegate	0.261197	281.334
110	Castlegate	0.202925	64.4889
110	Castlegate	0.250915	183.053
110	Castlegate	0.21833	71.7405
110	Castlegate	0.256551	309.057
110	Castlegate	0.266013	170.587
110	Castlegate	0.253738	204.767
110	Castlegate	0.195132	59.7388
110	Castlegate	0.247172	163.753
110	Castlegate	0.23057	144.499
110	Castlegate	0.222439	101.583
110	Castlegate	0.288715	355.719
110	Castlegate	0.206429	137.64
110	Castlegate	0.243878	168.14
110	Castlegate	0.234919	134.246
110	Castlegate	0.255957	268.285
120	Salt Wash North	0.179759	25.5537
120	Salt Wash North	0.223439	109.827
120	Salt Wash North	0.227527	214.016
120	Salt Wash North	0.194636	116.95
120	Salt Wash North	0.196745	59.8382
120	Salt Wash North	0.200653	70.9888
120	Salt Wash North	0.245238	211.626
120	Salt Wash North	0.19273	59.1925
120	Salt Wash North	0.219285	121.894
120	Salt Wash North	0.239829	148.717
120	Salt Wash North	0.222973	158.81
120	Salt Wash North	0.206763	51.5403
120	Salt Wash North	0.247831	201.225
120	Salt Wash North	0.202166	67.6158
120	Salt Wash North	0.248391	323.487
120	Salt Wash North	0.230782	214.02
120	Salt Wash North	0.247706	397.818
120	Salt Wash North	0.240044	229.139
120	Salt Wash North	0.211087	87.5358
120	Salt Wash North	0.209764	69.5693
120	Salt Wash North	0.244913	231.149
120	Salt Wash North	0.243653	253.499
120	Salt Wash North	0.230043	232.543
120	Salt Wash North	0.221953	192.78
120	Salt Wash North	0.233262	183.564
120	Salt Wash North	0.230446	196.743
120	Salt Wash North	0.208922	115.779
120	Salt Wash North	0.222269	186.431
120	Salt Wash North	0.255323	414.315
120	Salt Wash North	0.263189	270.903
120	Salt Wash North	0.222314	117.807
120	Salt Wash North	0.230993	200.964
120	Salt Wash North	0.210381	90.389
120	Salt Wash North	0.217454	138.494
120	Salt Wash North	0.261483	324.248
120	Salt Wash North	0.194058	35.417
120	Salt Wash North	0.200369	47.002
120	Salt Wash North	0.228944	196.113
120	Salt Wash North	0.233303	205.535
120	Salt Wash North	0.245945	179.532
120	Salt Wash North	0.187893	39.0983
120	Salt Wash North	0.233684	203.689
120	Salt Wash North	0.238535	128.962
120	Salt Wash North	0.218703	98.14
120	Salt Wash North	0.214018	96.36
120	Salt Wash North	0.222037	152.471
120	Salt Wash North	0.205424	66.4311
120	Salt Wash North	0.194153	53.0648
120	Salt Wash North	0.204781	80.3561
120	Salt Wash North	0.245127	291.856
120	Salt Wash North	0.256646	318.622
120	Salt Wash North	0.234877	231.629
120	Salt Wash North	0.217964	104.043
120	Salt Wash North	0.242114	225.131
120	Salt Wash North	0.205312	83.905
120	Salt Wash North	0.2132	73.0014
120	Salt Wash North	0.194448	87.8055
120	Salt Wash North	0.207053	112.17
120	Salt Wash North	0.242978	242.548
120	Salt Wash North	0.22161	132.84
120	Salt Wash North	0.240713	243.851
120	Salt Wash North	0.253882	241.819
120	Salt Wash North	0.209608	129.957
120	Salt Wash North	0.243752	265.559
120	Salt Wash North	0.250257	165.812
120	Salt Wash North	0.229176	169.518
120	Salt Wash North	0.212603	103.944
120	Salt Wash North	0.258659	367.779
120	Salt Wash North	0.185375	38.1836
120	Salt Wash North	0.177355	15.3089
120	Salt Wash North	0.22415	153.719
120	Salt Wash North	0.200477	86.2612
120	Salt Wash North	0.267057	451.694
120	Salt Wash North	0.228957	171.175
120	Salt Wash North	0.247837	591.615
120	Salt Wash North	0.195258	116.606
120	Salt Wash North	0.234197	142.275
120	Salt Wash North	0.187394	37.739
120	Salt Wash North	0.223812	243.811
120	Salt Wash North	0.219581	568.049
120	Salt Wash North	0.183812	18.9536
120	Salt Wash North	0.23656	241.127
120	Salt Wash North	0.182317	28.868
120	Salt Wash North	0.2536	226.27
120	Salt Wash North	0.203528	105.365
120	Salt Wash North	0.228766	173.3
120	Salt Wash North	0.226128	103.938
120	Salt Wash North	0.172821	8.61625
120	Salt Wash North	0.259528	433.378
120	Salt Wash North	0.200044	61.2394
120	Salt Wash North	0.186059	44.7158
120	Salt Wash North	0.202471	80.1213
120	Salt Wash North	0.245358	315.623
120	Salt Wash North	0.162853	12.0201
120	Salt Wash North	0.208193	114.724
120	Salt Wash North	0.235292	185.093
120	Salt Wash North	0.194073	103.688
120	Salt Wash North	0.245147	201.437
120	Salt Wash North	0.230737	230.822
120	Salt Wash North	0.245344	261.184
120	Salt Wash North	0.222147	140.783
120	Salt Wash North	0.24018	252.191
120	Salt Wash North	0.234995	166.281
120	Salt Wash North	0.226328	92.5489
120	Salt Wash North	0.228972	185.186
120	Salt Wash North	0.215174	135.039
120	Salt Wash North	0.189163	36.945
120	Salt Wash North	0.212425	149.2
120	Salt Wash North	0.216663	128.805
120	Salt Wash North	0.239573	314.465
120	Salt Wash North	0.196686	40.2391
120	Salt Wash North	0.222143	154.019
120	Salt Wash North	0.248019	284.921
120	Salt Wash North	0.246821	352.705
120	Salt Wash North	0.239234	203.021
120	Salt Wash North	0.197383	72.762
120	Salt Wash North	0.235436	134.01
120	Salt Wash North	0.213324	151.574
120	Salt Wash North	0.169134	18.7337
120	Salt Wash North	0.227486	195.041
120	Salt Wash North	0.234649	200.258
120	Salt Wash North	0.223585	121.822
120	Salt Wash North	0.217199	177.366
120	Salt Wash North	0.243637	158.191
120	Salt Wash North	0.258399	442.112
120	Salt Wash North	0.218299	153.994
120	Salt Wash North	0.229109	137.43
120	Salt Wash North	0.200129	56.0507
120	Salt Wash North	0.19262	47.6149
120	Salt Wash North	0.241911	326.755
120	Salt Wash North	0.234922	336.611
120	Salt Wash North	0.190313	24.2003
120	Salt Wash North	0.219169	130.905
120	Salt Wash North	0.201747	63.4583
120	Salt Wash North	0.227257	237.169
120	Salt Wash North	0.228336	191.975
120	Salt Wash North	0.184686	53.6561
120	Salt Wash North	0.244841	209.17
120	Salt Wash North	0.228731	135.028
120	Salt Wash North	0.183005	25.1444
120	Salt Wash North	0.176786	25.0771
120	Salt Wash North	0.192311	43.8782
120	Salt Wash North	0.19927	76.8247
120	Salt Wash North	0.23411	193.502
120	Salt Wash North	0.19199	74.4541
120	Salt Wash North	0.17989	26.4631
120	Salt Wash North	0.167314	13.5012
120	Salt Wash North	0.170794	22.8744
120	Salt Wash North	0.216256	149.674
120	Salt Wash North	0.197139	91.6584
120	Salt Wash North	0.173277	23.4771
120	Salt Wash North	0.202599	115.049
120	Salt Wash North	0.166366	7.83509
121	San Saba	0.177664	15.4932
121	San Saba	0.19308	26.3032
121	San Saba	0.180518	25.8779
121	San Saba	0.191739	28.9487
121	San Saba	0.199555	45.2525
121	San Saba	0.196801	36.7338
121	San Saba	0.184252	18.1649
121	San Saba	0.167798	9.38779
121	San Saba	0.203616	34.211
121	San Saba	0.201132	27.5887
121	San Saba	0.205297	53.5172
121	San Saba	0.19009	26.5729
121	San Saba	0.205273	38.0583
121	San Saba	0.206812	46.818
121	San Saba	0.205701	41.7215
121	San Saba	0.227046	74.8398
121	San Saba	0.204339	42.5496
121	San Saba	0.19474	33.641
121	San Saba	0.195879	39.1909
121	San Saba	0.19788	25.0506
121	San Saba	0.184816	22.4479
121	San Saba	0.211731	61.2134
121	San Saba	0.206766	37.4127
121	San Saba	0.198028	39.6192
121	San Saba	0.212882	34.9542
121	San Saba	0.199892	33.4642
121	San Saba	0.201712	36.0083
121	San Saba	0.200101	38.9344
121	San Saba	0.210751	46.8992
121	San Saba	0.202654	48.9624
121	San Saba	0.199234	53.177
121	San Saba	0.183494	15.9983
121	San Saba	0.20365	37.8381
121	San Saba	0.21275	55.7271
121	San Saba	0.214119	51.7668
121	San Saba	0.205285	39.7193
121	San Saba	0.201233	36.8471
121	San Saba	0.217793	65.4443
121	San Saba	0.212168	55.1741
121	San Saba	0.17768	11.3482
121	San Saba	0.193538	25.4695
121	San Saba	0.20562	36.0936
121	San Saba	0.208326	48.9244
121	San Saba	0.214116	39.6285
121	San Saba	0.198667	29.8153
121	San Saba	0.211686	45.7932
121	San Saba	0.196088	22.1946
121	San Saba	0.181931	11.9579
121	San Saba	0.211655	44.4404
121	San Saba	0.202423	45.8737
121	San Saba	0.206233	49.137
121	San Saba	0.217482	55.0822
121	San Saba	0.204418	26.6944
121	San Saba	0.209322	55.0104
121	San Saba	0.21595	50.6184
121	San Saba	0.195895	30.0704
121	San Saba	0.197148	29.8939
121	San Saba	0.184183	14.8346
121	San Saba	0.201157	45.1979
121	San Saba	0.205332	47.519
121	San Saba	0.215777	56.6352
121	San Saba	0.21453	50.1225
121	San Saba	0.194952	21.33
121	San Saba	0.202525	32.784
121	San Saba	0.208508	44.7855
121	San Saba	0.198025	34.813
121	San Saba	0.197085	32.9995
121	San Saba	0.173501	13.0916
121	San Saba	0.226569	92.6497
121	San Saba	0.219138	70.0471
121	San Saba	0.20004	33.626
121	San Saba	0.223801	96.2094
121	San Saba	0.199433	29.4846
121	San Saba	0.204737	37.4295
121	San Saba	0.208754	50.4998
121	San Saba	0.186642	17.6877
121	San Saba	0.195076	24.6494
121	San Saba	0.199625	40.8127
121	San Saba	0.1893	20.3491
121	San Saba	0.162633	5.49184
121	San Saba	0.21412	52.734
121	San Saba	0.210361	50.0352
121	San Saba	0.200398	41.4327
121	San Saba	0.201649	48.3491
121	San Saba	0.196625	31.476
121	San Saba	0.205047	38.0596
121	San Saba	0.193099	27.6454
121	San Saba	0.19445	28.9327
121	San Saba	0.198078	31.087
121	San Saba	0.20873	76.6917
121	San Saba	0.194747	31.0549
121	San Saba	0.195331	31.3432
121	San Saba	0.210098	41.5893
121	San Saba	0.215173	58.2039
121	San Saba	0.208066	41.7048
121	San Saba	0.199752	38.6688
121	San Saba	0.208102	53.7002
121	San Saba	0.20286	47.1222
121	San Saba	0.209137	36.9325
121	San Saba	0.220916	51.0379
121	San Saba	0.207577	64.9825
121	San Saba	0.198098	29.3289
121	San Saba	0.19862	58.0032
121	San Saba	0.201278	62.7918
121	San Saba	0.212507	92.8523
121	San Saba	0.204162	36.745
121	San Saba	0.210446	40.8867
121	San Saba	0.185452	20.3163
121	San Saba	0.198218	40.5466
121	San Saba	0.222561	77.8668
121	San Saba	0.205631	41.2957
121	San Saba	0.193713	32.056
121	San Saba	0.183225	17.5188
121	San Saba	0.208874	52.383
121	San Saba	0.204189	47.7802
121	San Saba	0.211827	60.2912
121	San Saba	0.182002	15.536
121	San Saba	0.186263	30.1817
121	San Saba	0.191104	41.0225
121	San Saba	0.17913	23.1779
121	San Saba	0.203285	36.1178
121	San Saba	0.187025	25.2857
123	Torrey Buff	0.157499	4.3735
123	Torrey Buff	0.166557	11.7413
123	Torrey Buff	0.149614	2.02001
123	Torrey Buff	0.154134	2.09306
123	Torrey Buff	0.155651	1.99986
123	Torrey Buff	0.164115	13.1451
123	Torrey Buff	0.158606	4.26928
123	Torrey Buff	0.153259	2.11792
123	Torrey Buff	0.15018	1.45035
123	Torrey Buff	0.149009	0.94133
123	Torrey Buff	0.154129	2.42568
123	Torrey Buff	0.154123	2.99367
123	Torrey Buff	0.164723	5.8956
123	Torrey Buff	0.147226	0.426055
123	Torrey Buff	0.157736	1.62429
123	Torrey Buff	0.165355	7.3863
123	Torrey Buff	0.159999	6.97439
123	Torrey Buff	0.156914	2.08858
123	Torrey Buff	0.152723	1.93322
123	Torrey Buff	0.149132	0.403633
123	Torrey Buff	0.154545	2.04929
123	Torrey Buff	0.160844	3.0159
123	Torrey Buff	0.155021	1.7712
123	Torrey Buff	0.15899	1.65414
123	Torrey Buff	0.166791	4.5419
123	Torrey Buff	0.153826	2.97759
123	Torrey Buff	0.160937	7.69068
123	Torrey Buff	0.159545	3.56271
123	Torrey Buff	0.156907	3.47684
123	Torrey Buff	0.151829	1.39121
123	Torrey Buff	0.156059	2.97747
123	Torrey Buff	0.170256	6.7106
123	Torrey Buff	0.164537	3.05566
123	Torrey Buff	0.166263	7.95613
123	Torrey Buff	0.154628	3.40325
123	Torrey Buff	0.158138	2.72138
123	Torrey Buff	0.161481	3.5158
123	Torrey Buff	0.151947	1.66454
123	Torrey Buff	0.174692	15.7785
123	Torrey Buff	0.152589	1.66695
123	Torrey Buff	0.159048	2.49405
123	Torrey Buff	0.157279	1.79341
123	Torrey Buff	0.150207	0.960707
123	Torrey Buff	0.154614	1.73912
123	Torrey Buff	0.154796	1.60123
123	Torrey Buff	0.14944	1.65403
123	Torrey Buff	0.156556	2.20426
123	Torrey Buff	0.160321	2.20954
123	Torrey Buff	0.162781	3.56852
123	Torrey Buff	0.14998	0.71821
123	Torrey Buff	0.153713	1.44501
123	Torrey Buff	0.159441	3.53438
123	Torrey Buff	0.157489	2.81423
123	Torrey Buff	0.156235	1.61352
123	Torrey Buff	0.16006	3.86444
123	Torrey Buff	0.153793	1.65833
123	Torrey Buff	0.161378	2.90307
123	Torrey Buff	0.160602	2.81202
123	Torrey Buff	0.153332	1.60857
123	Torrey Buff	0.157998	2.13118
123	Torrey Buff	0.158572	2.58153
123	Torrey Buff	0.177263	18.7228
123	Torrey Buff	0.162216	3.55912
123	Torrey Buff	0.16061	5.8187
123	Torrey Buff	0.156197	2.15827
123	Torrey Buff	0.159226	2.75305
123	Torrey Buff	0.152453	2.4391
123	Torrey Buff	0.150612	0.775659
123	Torrey Buff	0.149789	0.869417
123	Torrey Buff	0.168396	9.19686
123	Torrey Buff	0.155544	1.97208
123	Torrey Buff	0.157117	2.83845
123	Torrey Buff	0.15766	3.12993
123	Torrey Buff	0.165217	4.86535
123	Torrey Buff	0.151773	0.709613
123	Torrey Buff	0.159993	2.74335
123	Torrey Buff	0.157123	2.12273
123	Torrey Buff	0.158487	3.52862
123	Torrey Buff	0.153727	2.596
123	Torrey Buff	0.154704	2.17369
123	Torrey Buff	0.160016	4.69611
123	Torrey Buff	0.158605	2.99844
123	Torrey Buff	0.160277	3.66824
123	Torrey Buff	0.160495	2.56358
123	Torrey Buff	0.161087	3.61131
123	Torrey Buff	0.159767	2.75979
123	Torrey Buff	0.165841	7.13068
123	Torrey Buff	0.159199	5.02695
123	Torrey Buff	0.176341	9.55821
123	Torrey Buff	0.152395	1.78624
123	Torrey Buff	0.152741	1.97436
123	Torrey Buff	0.157063	3.23358
123	Torrey Buff	0.152996	1.82047
123	Torrey Buff	0.157682	1.48022
123	Torrey Buff	0.159461	2.72509
123	Torrey Buff	0.156489	2.88341
123	Torrey Buff	0.16044	2.64411
123	Torrey Buff	0.162119	4.51754
123	Torrey Buff	0.161663	3.40994
123	Torrey Buff	0.157645	3.24623
123	Torrey Buff	0.155109	2.12591
123	Torrey Buff	0.160291	3.34755
123	Torrey Buff	0.157442	2.67622
123	Torrey Buff	0.149361	1.12502
