# Supplementary material for: Digital Rock Physics in Cuttings Using High-Resolution Thin Section Scan Images
Source: MDPI journal article supplement (doi:10.3390/min13091140), 2023-08-29
Supplement: s1 [file s1 › minerals-2465930-table S4-Digital Rock Physics (DRP) results for cuttings samples. .xlsx]

## Sheet: DRP_cuttings
Sample ID	Porosity (frac.)	Permeability (mD)	Cluster
Cuttings (DRP) Well 1	0.0275914	179.865	1
Cuttings (DRP) Well 1	0.0271841	11.5906	1
Cuttings (DRP) Well 1	0.0217718	3.96364	2
Cuttings (DRP) Well 1	0.0212399	0.431097	2
Cuttings (DRP) Well 1	0.0182514	3.76654	2
Cuttings (DRP) Well 1	0.0172695	0.328264	2
Cuttings (DRP) Well 1	0.0168262	16.5324	1
Cuttings (DRP) Well 1	0.0160917	0.349883	1
Cuttings (DRP) Well 1	0.0160605	4.72654	1
Cuttings (DRP) Well 1	0.0146558	1.39595	1
Cuttings (DRP) Well 1	0.0141634	0.132539	2
Cuttings (DRP) Well 1	0.0141019	0.624449	1
Cuttings (DRP) Well 1	0.0139081	0.441702	0
Cuttings (DRP) Well 1	0.0135705	1.53223	1
Cuttings (DRP) Well 1	0.0133657	0.126785	2
Cuttings (DRP) Well 1	0.0132289	0.116557	2
Cuttings (DRP) Well 1	0.0131636	0.791966	2
Cuttings (DRP) Well 1	0.013035	0.221383	2
Cuttings (DRP) Well 1	0.013017	0.220934	2
Cuttings (DRP) Well 1	0.0130159	1.13413	2
Cuttings (DRP) Well 1	0.0128549	0.212733	2
Cuttings (DRP) Well 1	0.0126445	0.375841	1
Cuttings (DRP) Well 1	0.0121907	5.40806	1
Cuttings (DRP) Well 1	0.0121809	0.449873	1
Cuttings (DRP) Well 1	0.0121261	0.597026	1
Cuttings (DRP) Well 1	0.0120342	11.2198	1
Cuttings (DRP) Well 1	0.0119925	0.742416	2
Cuttings (DRP) Well 1	0.0118528	8.06612	1
Cuttings (DRP) Well 1	0.0116794	0.187409	1
Cuttings (DRP) Well 1	0.0112997	3.44539	1
Cuttings (DRP) Well 1	0.0112942	0.644963	1
Cuttings (DRP) Well 1	0.0111654	0.942315	1
Cuttings (DRP) Well 1	0.0110558	0.449752	2
Cuttings (DRP) Well 1	0.0109614	9.49005	0
Cuttings (DRP) Well 1	0.0109493	0.735891	2
Cuttings (DRP) Well 1	0.0108237	0.568449	1
Cuttings (DRP) Well 1	0.0106903	1.149	1
Cuttings (DRP) Well 1	0.0106823	0.0875668	2
Cuttings (DRP) Well 1	0.0105428	0.907108	1
Cuttings (DRP) Well 1	0.0105274	0.754808	1
Cuttings (DRP) Well 1	0.0103925	0.499206	1
Cuttings (DRP) Well 1	0.0103109	0.887548	1
Cuttings (DRP) Well 1	0.0102475	1.05583	1
Cuttings (DRP) Well 2	0.0211005	0.49976	0
Cuttings (DRP) Well 2	0.0182724	0.351447	0
Cuttings (DRP) Well 2	0.0181788	5.74795	0
Cuttings (DRP) Well 2	0.0179189	0.195052	2
Cuttings (DRP) Well 2	0.0175405	0.18903	2
Cuttings (DRP) Well 2	0.016935	0.172343	0
Cuttings (DRP) Well 2	0.0169334	4.89645	2
Cuttings (DRP) Well 2	0.016634	0.17485	0
Cuttings (DRP) Well 2	0.0159579	0.277498	0
Cuttings (DRP) Well 2	0.0155746	0.146408	0
Cuttings (DRP) Well 2	0.0148416	2.37899	2
Cuttings (DRP) Well 2	0.0146524	0.487512	2
Cuttings (DRP) Well 2	0.0144983	0.239455	0
Cuttings (DRP) Well 2	0.0140423	0.231908	0
Cuttings (DRP) Well 2	0.0133359	0.124654	2
Cuttings (DRP) Well 2	0.0130358	0.894316	0
Cuttings (DRP) Well 2	0.0124783	0.110029	0
Cuttings (DRP) Well 2	0.0124321	4.24928	2
Cuttings (DRP) Well 2	0.0121084	0.488268	2
Cuttings (DRP) Well 2	0.0116976	0.104231	0
Cuttings (DRP) Well 2	0.0112792	0.178049	2
Cuttings (DRP) Well 2	0.0107692	0.164006	0
Cuttings (DRP) Well 2	0.0104109	3.47626	2
Cuttings (DRP) Well 2	0.0102937	1.47498	2
Cuttings (DRP) Well 2	0.0102566	0.147921	0
Cuttings (DRP) Well 2	0.0102086	3.36307	2
Cuttings (DRP) Well 2	0.0100534	1.4707	0
Cuttings (DRP) Well 2	0.0100276	0.078273	0
Cuttings (DRP) Well 3	0.01781	0.350207	0
Cuttings (DRP) Well 3	0.0174847	0.189501	3
Cuttings (DRP) Well 3	0.0103312	0.188612	0
Cuttings (DRP) Well 4	0.0222754	0.477157	0
Cuttings (DRP) Well 4	0.0198066	0.462626	0
Cuttings (DRP) Well 4	0.0174676	1.18768	0
Cuttings (DRP) Well 4	0.0159558	0.616827	0
Cuttings (DRP) Well 4	0.0152862	0.287167	0
Cuttings (DRP) Well 4	0.0139761	3.19981	2
Cuttings (DRP) Well 4	0.0136087	1.56154	0
Cuttings (DRP) Well 4	0.0125443	0.205222	0
Cuttings (DRP) Well 4	0.0122122	0.201046	0
Cuttings (DRP) Well 4	0.0119272	0.193281	0
Cuttings (DRP) Well 4	0.0116185	0.187296	0
Cuttings (DRP) Well 4	0.0113198	0.16754	0
Cuttings (DRP) Well 4	0.0111571	0.165404	0
Cuttings (DRP) Well 4	0.0101686	0.252507	0
Cuttings (DRP) Well 4	0.0101682	0.159543	0
Cuttings (DRP) Well 5	0.0350591	0.850064	0
Cuttings (DRP) Well 5	0.0307165	1.35872	0
Cuttings (DRP) Well 5	0.0254008	16.8241	0
Cuttings (DRP) Well 5	0.0248968	4.25334	0
Cuttings (DRP) Well 5	0.0246432	1.0271	0
Cuttings (DRP) Well 5	0.0237896	0.653653	0
Cuttings (DRP) Well 5	0.023788	0.589854	0
Cuttings (DRP) Well 5	0.0234461	1.00515	0
Cuttings (DRP) Well 5	0.022332	0.849973	0
Cuttings (DRP) Well 5	0.0220719	0.945159	0
Cuttings (DRP) Well 5	0.0212631	0.746471	0
Cuttings (DRP) Well 5	0.0209861	0.415003	3
Cuttings (DRP) Well 5	0.020201	0.421183	0
Cuttings (DRP) Well 5	0.0200369	2.81409	0
Cuttings (DRP) Well 5	0.0200184	0.789329	0
Cuttings (DRP) Well 5	0.01986	0.452455	2
Cuttings (DRP) Well 5	0.0194297	0.685847	0
Cuttings (DRP) Well 5	0.0190965	0.648751	0
Cuttings (DRP) Well 5	0.0189721	0.624614	2
Cuttings (DRP) Well 5	0.0185276	0.408043	0
Cuttings (DRP) Well 5	0.0181504	0.69001	0
Cuttings (DRP) Well 5	0.0179406	0.426804	3
Cuttings (DRP) Well 5	0.0176707	0.628634	0
Cuttings (DRP) Well 5	0.0174054	0.627857	0
Cuttings (DRP) Well 5	0.017236	1.43793	0
Cuttings (DRP) Well 5	0.0171854	0.99233	0
Cuttings (DRP) Well 5	0.0170951	0.328024	0
Cuttings (DRP) Well 5	0.0169729	0.605064	0
Cuttings (DRP) Well 5	0.016853	0.556461	0
Cuttings (DRP) Well 5	0.0167853	0.540709	0
Cuttings (DRP) Well 5	0.0166882	0.604155	0
Cuttings (DRP) Well 5	0.0166531	0.398122	0
Cuttings (DRP) Well 5	0.0166444	0.315395	0
Cuttings (DRP) Well 5	0.0166413	0.821358	0
Cuttings (DRP) Well 5	0.0162156	0.510044	2
Cuttings (DRP) Well 5	0.0161466	0.301633	0
Cuttings (DRP) Well 5	0.0160338	0.514962	0
Cuttings (DRP) Well 5	0.015861	0.574948	0
Cuttings (DRP) Well 5	0.0157314	24.0478	0
Cuttings (DRP) Well 5	0.015684	0.300817	0
Cuttings (DRP) Well 5	0.0156244	0.460948	0
Cuttings (DRP) Well 5	0.0155163	0.333939	0
Cuttings (DRP) Well 5	0.0153148	0.269593	0
Cuttings (DRP) Well 5	0.0152564	0.468491	0
Cuttings (DRP) Well 5	0.0152328	0.316238	0
Cuttings (DRP) Well 5	0.0151149	0.309275	0
Cuttings (DRP) Well 5	0.014911	0.467528	2
Cuttings (DRP) Well 5	0.0148263	0.588149	0
Cuttings (DRP) Well 5	0.014684	0.716107	2
Cuttings (DRP) Well 5	0.0145957	0.500916	0
Cuttings (DRP) Well 5	0.0145349	0.448424	0
Cuttings (DRP) Well 5	0.0145322	0.241844	0
Cuttings (DRP) Well 5	0.0144719	1.05159	0
Cuttings (DRP) Well 5	0.0143788	1.61138	0
Cuttings (DRP) Well 5	0.0140947	0.49517	0
Cuttings (DRP) Well 5	0.0140747	0.42951	2
Cuttings (DRP) Well 5	0.0140128	0.466266	0
Cuttings (DRP) Well 5	0.0136055	0.406931	0
Cuttings (DRP) Well 5	0.0136008	0.262629	0
Cuttings (DRP) Well 5	0.0133888	0.280611	3
Cuttings (DRP) Well 5	0.0133049	0.223763	0
Cuttings (DRP) Well 5	0.0130152	0.384924	0
Cuttings (DRP) Well 5	0.0129496	0.273733	0
Cuttings (DRP) Well 5	0.0128964	0.641398	0
Cuttings (DRP) Well 5	0.0128779	0.239406	0
Cuttings (DRP) Well 5	0.0128271	0.203029	0
Cuttings (DRP) Well 5	0.012798	0.251626	0
Cuttings (DRP) Well 5	0.0127723	0.236525	0
Cuttings (DRP) Well 5	0.0126223	0.257328	0
Cuttings (DRP) Well 5	0.0126046	0.410187	0
Cuttings (DRP) Well 5	0.0125712	0.11704	0
Cuttings (DRP) Well 5	0.0124687	1.99657	3
Cuttings (DRP) Well 5	0.0124634	0.228169	0
Cuttings (DRP) Well 5	0.0123856	0.666249	0
Cuttings (DRP) Well 5	0.0123771	0.345582	0
Cuttings (DRP) Well 5	0.012368	0.336685	0
Cuttings (DRP) Well 5	0.0123444	0.444876	0
Cuttings (DRP) Well 5	0.0123194	0.361728	0
Cuttings (DRP) Well 5	0.0123083	0.247975	0
Cuttings (DRP) Well 5	0.012277	0.540749	3
Cuttings (DRP) Well 5	0.0122451	0.362362	3
Cuttings (DRP) Well 5	0.0121974	9.22946	0
Cuttings (DRP) Well 5	0.0121455	1.06808	0
Cuttings (DRP) Well 5	0.0120898	0.190645	0
Cuttings (DRP) Well 5	0.0120441	0.204075	0
Cuttings (DRP) Well 5	0.0119619	0.211034	0
Cuttings (DRP) Well 5	0.0119507	0.201756	0
Cuttings (DRP) Well 5	0.0118463	0.10194	0
Cuttings (DRP) Well 5	0.0118168	0.184352	2
Cuttings (DRP) Well 5	0.0117876	0.221461	0
Cuttings (DRP) Well 5	0.0117873	0.346376	0
Cuttings (DRP) Well 5	0.0116944	0.564601	0
Cuttings (DRP) Well 5	0.011679	0.184865	3
Cuttings (DRP) Well 5	0.0115158	0.319278	0
Cuttings (DRP) Well 5	0.0114729	0.400362	0
Cuttings (DRP) Well 5	0.011421	0.315973	3
Cuttings (DRP) Well 5	0.0113885	0.393751	0
Cuttings (DRP) Well 5	0.0113699	0.227239	0
Cuttings (DRP) Well 5	0.0113243	0.31962	0
Cuttings (DRP) Well 5	0.0112906	0.445039	3
Cuttings (DRP) Well 5	0.0112192	0.810339	0
Cuttings (DRP) Well 5	0.0111924	0.355263	2
Cuttings (DRP) Well 5	0.0111644	0.214281	2
Cuttings (DRP) Well 5	0.0111319	0.809973	3
Cuttings (DRP) Well 5	0.0110522	0.359863	0
Cuttings (DRP) Well 5	0.0110169	0.166184	0
Cuttings (DRP) Well 5	0.0108871	0.16903	0
Cuttings (DRP) Well 5	0.0108791	0.156455	0
Cuttings (DRP) Well 5	0.0108655	0.0933562	2
Cuttings (DRP) Well 5	0.0108378	0.430922	0
Cuttings (DRP) Well 5	0.0108348	0.162287	0
Cuttings (DRP) Well 5	0.0108268	0.353858	0
Cuttings (DRP) Well 5	0.0107547	3.461	0
Cuttings (DRP) Well 5	0.0106306	0.272764	0
Cuttings (DRP) Well 5	0.0106291	0.164336	0
Cuttings (DRP) Well 5	0.0106208	0.297198	3
Cuttings (DRP) Well 5	0.010598	0.31298	2
Cuttings (DRP) Well 5	0.0105566	0.349707	3
Cuttings (DRP) Well 5	0.0105314	0.190658	0
Cuttings (DRP) Well 5	0.0105168	0.178791	0
Cuttings (DRP) Well 5	0.0104346	0.176741	0
Cuttings (DRP) Well 5	0.0103909	0.309674	2
Cuttings (DRP) Well 5	0.010387	0.432113	0
Cuttings (DRP) Well 5	0.0103836	0.275878	0
Cuttings (DRP) Well 5	0.0103496	5.26009	0
Cuttings (DRP) Well 5	0.0103426	2.35445	0
Cuttings (DRP) Well 5	0.0103025	0.534809	2
Cuttings (DRP) Well 5	0.0102872	0.29776	0
Cuttings (DRP) Well 5	0.0102537	0.260158	3
Cuttings (DRP) Well 5	0.010196	0.260291	3
Cuttings (DRP) Well 5	0.0101721	0.169285	2
Cuttings (DRP) Well 5	0.0100978	1.35274	0
Cuttings (DRP) Well 5	0.0100893	0.171703	0
Cuttings (DRP) Well 5	0.0100341	0.150999	0
