# Supplementary material for: Digital Rock Physics in Cuttings Using High-Resolution Thin Section Scan Images
Source: MDPI journal article supplement (doi:10.3390/min13091140), 2023-08-29
Supplement: s1 [file s1 › minerals-2465930-TablesS1-S2.pdf]

## Supplementary A

In this Supplementary all the measured (RCAL) and computed (DRP) results are provided.

**Table S1.** Routine Core Analysis (RCAL) results for plugs samples.

| Sample ID | Name            | Porosity (frac.) | Permeability (mD) |
|-----------|-----------------|------------------|-------------------|
| SS-121    | San Saba        | 0,21             | 65,9              |
| SS-121    | San Saba        | 0,21             | 67,6              |
| SS-121    | San Saba        | 0,21             | 71,5              |
| SS-121    | San Saba        | 0,21             | 71,2              |
| SS-121    | San Saba        | 0,21             | 66,0              |
| SS-106    | Berea Spider    | 0,21             | 261,4             |
| SS-106    | Berea Spider    | 0,21             | 262,4             |
| SS-106    | Berea Spider    | 0,21             | 269,7             |
| SS-106    | Berea Spider    | 0,21             | 246,5             |
| SS-106    | Berea Spider    | 0,21             | 241,8             |
| SS-110    | Castlegate      | 0,28             | 804,6             |
| SS-110    | Castlegate      | 0,28             | 762,6             |
| SS-110    | Castlegate      | 0,28             | 838,1             |
| SS-110    | Castlegate      | 0,28             | 811,8             |
| SS-110    | Castlegate      | 0,28             | 786,4             |
| SS-120    | Salt Wash North | 0,23             | 707,5             |
| SS-120    | Salt Wash North | 0,22             | 700,0             |
| SS-120    | Salt Wash North | 0,21             | 368,3             |
| SS-120    | Salt Wash North | 0,23             | 782,2             |
| SS-120    | Salt Wash North | 0,22             | 552,5             |
| SS-100    | Bandera Brown   | 0,26             | 84,9              |
| SS-100    | Bandera Brown   | 0,26             | 81,1              |
| SS-100    | Bandera Brown   | 0,26             | 83,6              |
| SS-100    | Bandera Brown   | 0,26             | 81,6              |
| SS-100    | Bandera Brown   | 0,26             | 90,0              |
| SS-109    | Carbon Tan      | 0,17             | 53,3              |
| SS-109    | Carbon Tan      | 0,17             | 53,0              |
| SS-109    | Carbon Tan      | 0,17             | 53,0              |
| SS-109    | Carbon Tan      | 0,17             | 54,2              |
| SS-109    | Carbon Tan      | 0,17             | 49,5              |
| SS-123    | Torrey Buff     | 0,17             | 3,3               |
| SS-123    | Torrey Buff     | 0,17             | 3,3               |
| SS-123    | Torrey Buff     | 0,17             | 3,3               |
| SS-123    | Torrey Buff     | 0,16             | 3,1               |
| SS-123    | Torrey Buff     | 0,16             | 3,2               |

**Table S2.** Digital Rock Physics (DRP) results for plugs samples.

| Sample ID | Name            | Porosity (frac.) | Permeability (mD) |
|-----------|-----------------|------------------|-------------------|
| SS-100    | Bandera Brown   | 0,25             | 34,8              |
| SS-100    | Bandera Brown   | 0,22             | 35,0              |
| SS-100    | Bandera Brown   | 0,21             | 34,4              |
| SS-100    | Bandera Brown   | 0,22             | 33,3              |
| SS-100    | Bandera Brown   | 0,21             | 33,2              |
| SS-106    | Berea Spider    | 0,23             | 453,2             |
| SS-106    | Berea Spider    | 0,26             | 644,0             |
| SS-106    | Berea Spider    | 0,26             | 483,9             |
| SS-106    | Berea Spider    | 0,26             | 621,5             |
| SS-106    | Berea Spider    | 0,24             | 435,7             |
| SS-109    | Carbon Tan      | 0,18             | 77,4              |
| SS-109    | Carbon Tan      | 0,18             | 99,3              |
| SS-109    | Carbon Tan      | 0,22             | 102,4             |
| SS-109    | Carbon Tan      | 0,18             | 91,4              |
| SS-109    | Carbon Tan      | 0,19             | 92,6              |
| SS-110    | Castlegate      | 0,21             | 395,6             |
| SS-110    | Castlegate      | 0,23             | 392,7             |
| SS-110    | Castlegate      | 0,22             | 439,8             |
| SS-110    | Castlegate      | 0,22             | 394,6             |
| SS-110    | Castlegate      | 0,27             | 550,9             |
| SS-120    | Salt Wash North | 0,23             | 530,3             |
| SS-120    | Salt Wash North | 0,24             | 634,3             |
| SS-120    | Salt Wash North | 0,24             | 521,8             |
| SS-120    | Salt Wash North | 0,22             | 557,5             |
| SS-120    | Salt Wash North | 0,24             | 529,8             |
| SS-121    | San Saba        | 0,24             | 44,2              |
| SS-121    | San Saba        | 0,22             | 44,1              |
| SS-121    | San Saba        | 0,24             | 54,9              |
| SS-121    | San Saba        | 0,23             | 54,5              |
| SS-121    | San Saba        | 0,23             | 44,0              |
| SS-123    | Torrey Buff     | 0,16             | 2,5               |
| SS-123    | Torrey Buff     | 0,16             | 2,3               |
| SS-123    | Torrey Buff     | 0,14             | 1,8               |
| SS-123    | Torrey Buff     | 0,23             | 2,1               |
| SS-123    | Torrey Buff     | 0,13             | 3,4               |
